# Supplementary material
Source: publisher figshare collection journal article supplement (https://future-science-group.figshare.com/ndownloader/files/28220937)
Supplement: Supplementary file 1 [file 28220937]

**Appendices**

**Appendix 1: Literature Database Search Results**

Database searches were run on December 18, 2019.

Results of each search are shown below.

**Table A 1: Embase Search Strategy, run December 18, 2019**

*Embase <1974 to 2019 December 17>*

| **Step** | **Search String** | **Hits** |
| --- | --- | --- |
| 1 | (neoplasm$ or glioblastoma$ or cancer* or leukemi$ or leukaemi$ or tumour$ or tumor$ or malignan$ or carcinoma$ or adenocarcinoma$ or lymphoma$ or oncolog$ or gliom$).ti,ab. | 4489459 |
| 2 | (phase 1 or phase 1a or phase 1b or phase I or phase Ia or phase Ib).ti,ab. | 97896 |
| 3 | (animal$ not human$).sh,hw. | 4288387 |
| 4 | (conference abstract or congress or editorial or comment* or letter or note or case series or case study or case studies or case reports or erratum).pt. | 6343733 |
| 5 | (infant or child* or pediatric* or paediatric* or child* or adolescen*).ti,ab. | 2170795 |
| 6 | 1 and 2 | 52104 |
| 7 | or/3-5 | 12067150 |
| 8 | 6 not 7 | 24753 |
| 9 | (phase 2* or phase 3* or phase 4* or phase II* or phase III* or phase IV*).ti. | 65986 |
| 10 | 8 not 9 | 23880 |
| 11 | (radiation or radiotherap* or surg* or devic* or lifestyle or behaviour* or behavior* or educat* or alternative medicine or herbal or plant or diet*).ti. | 1777287 |
| 12 | 10 not 11 | 22014 |
| 13 | limit 12 to english language | 21037 |
| 14 | limit 13 to yr="2019 -Current" | 1091 |

**Table A 2: Medline search strategy, run December 18, 2019**

*MEDLINE(R) and Epub Ahead of Print, In-Process & Other Non-Indexed Citations and Daily <1946 to December 17, 2019>*

| **Step** | **Search String** | **Hits** |
| --- | --- | --- |
| 1 | (neoplasm$ or glioblastoma$ or cancer* or leukemi$ or leukaemi$ or tumour$ or tumor$ or malignan$ or carcinoma$ or adenocarcinoma$ or lymphoma$ or oncolog$ or gliom$).ti,ab. | 3430135 |
| 2 | (phase 1 or phase 1a or phase 1b or phase I or phase Ia or phase Ib).ti,ab. | 56659 |
| 3 | (animals not (humans and animals)).sh. | 4622731 |
| 4 | (editorial or comment* or letter or note or case series or case study or case studies or case reports or erratum).pt. | 3648713 |
| 5 | (infant or child* or pediatric* or paediatric* or child* or adolescen*).ti,ab. | 1742666 |
| 6 | 1 and 2 | 25931 |
| 7 | or/3-5 | 9654010 |
| 8 | 6 not 7 | 23497 |
| 9 | (phase 2* or phase 3* or phase4* or phase II* or phase III* or phase IV*).ti. | 32204 |
| 10 | 8 not 9 | 22670 |
| 11 | (radiation or radiotherap* or surg* or devic* or lifestyle or behaviour* or behavior* or educat* or alternative medicine or herbal or plant or diet*).ti. | 1613810 |
| 12 | 10 not 11 | 20884 |
| 13 | limit 12 to english language | 20212 |
| 14 | limit 13 to yr="2019 -Current" | 1213 |

**Table A 3: PubMed search strategy, run December 18, 2019**

| Step | Terms | | Hits |
| --- | --- | --- | --- |
|  |  | |  |
| 1 | (neoplasm*[Title/Abstract] OR glioblastoma*[Title/Abstract] OR cancer[Title/Abstract] OR cancers[Title/Abstract] OR cancerous[Title/Abstract] OR leukemia*[Title/Abstract] OR leukemic[Title/Abstract] OR leukaemia*[Title/Abstract] OR leukaemic[Title/Abstract] OR tumour[Title/Abstract] OR tumours[Title/Abstract] OR tumor[Title/Abstract] OR tumors[Title/Abstract] OR malignant[Title/Abstract] OR malignancy[Title/Abstract] OR malignancies[Title/Abstract] OR carcinoma*[Title/Abstract] OR adenocarcinoma*[Title/Abstract] OR lymphoma*[Title/Abstract] OR oncolog*[Title/Abstract] OR gliom*[Title/Abstract] OR glioblast*).[Title/Abstract]) | | 3479728 |
| 2 | (phase 1[Title/Abstract] OR phase 1a[Title/Abstract] OR phase 1b[Title/Abstract] OR phase I[Title/Abstract] OR phase Ia[Title/Abstract] OR phase Ib[Title/Abstract]) | | 57366 |
| 3 | 1 AND 2 | | 26020 |
| 4 | (animal* [ti] or in vitro [ti] or tissue* [ti] or murine [ti] or mouse [ti] or mice [ti] or swine*[ti] or pig* [ti] or porcine[ti] or rat [ti] or rodent* [ti] or monkey [ti] or ape [ti] or dog [ti] or canine* [ti] or cat [ti] or feline* [ti] or cow [ti] or bovine [ti] or horse [ti] or equine [ti] or fish [ti] or piscine [ti] or rabbit* [ti]) | | 2312477 |
| 5 | 3 NOT 4 | | 25037 |
| 6 | editorial [pt] or comment* [pt] or letter [pt] or case reports [pt] or congress [pt] or published erratum [pt] | | 3786149 |
| 7 | 5 NOT 6 | | 24386 |
| 8 | (infant[Title/Abstract] OR child*[Title/Abstract] OR pediatric*[Title/Abstract] OR paediatric*[Title/Abstract] OR child*[Title/Abstract] OR adolescen*[Title/Abstract]) | | 1809790 |
| 9 | 7 NOT 8 | | 23281 |
| 10 | (radiation[Title] OR radiotherap*[Title] OR surg*[Title] OR devic*[Title] OR lifestyle[Title] OR behaviour*[Title] OR behavior*[Title] OR educat*[Title] OR alternative medicine[Title] OR herbal[Title] OR plant[Title] OR diet*).[Title]) | | 2070341 |
| 11 | 9 NOT 10 |
| 12 | Limit 11 to English language | | 20576 |
| 13 | Limit 12 to Publication date from 2019/01/01 to 2019/12/31 | | 1218 |
